# Supplementary material
Source: PubMed Central journal article supplement (PMC7758153)
Supplement: 10-1055-s-0040-1721320-s200054ra.pdf [file 10-1055-s-0040-1721320-s200054ra.pdf]

**Supplementary Table S1** Fill-up form used to estimate the time per task

|                               | Maximum time per patient | Minimum time per patient | Average time per patient | Daily number of visitors (minimum, average, maximum) |
|-------------------------------|--------------------------|--------------------------|--------------------------|------------------------------------------------------|
| General doctor\chronic clinic |                          |                          |                          |                                                      |
| Reception                     |                          |                          |                          |                                                      |
| pharmacy                      |                          |                          |                          |                                                      |
| Laboratory                    |                          |                          |                          |                                                      |
| X-ray                         |                          |                          |                          |                                                      |
| Others if any                 |                          |                          |                          |                                                      |

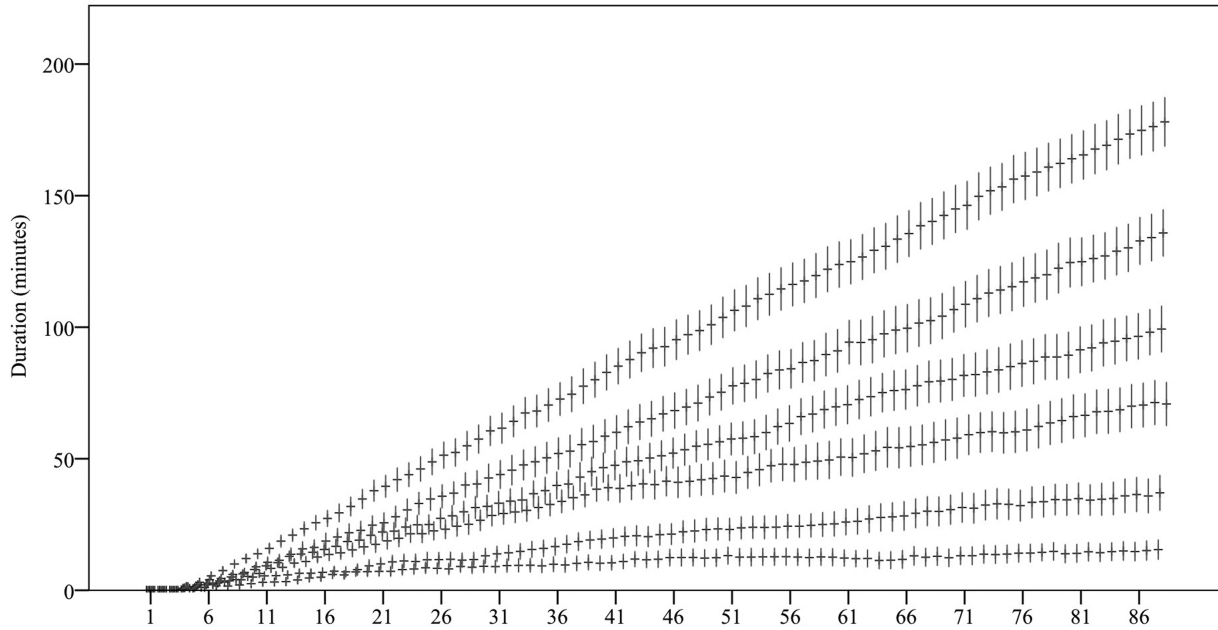

**Supplementary Fig. S1** The patients waiting time error bars with 95% confidence intervals.

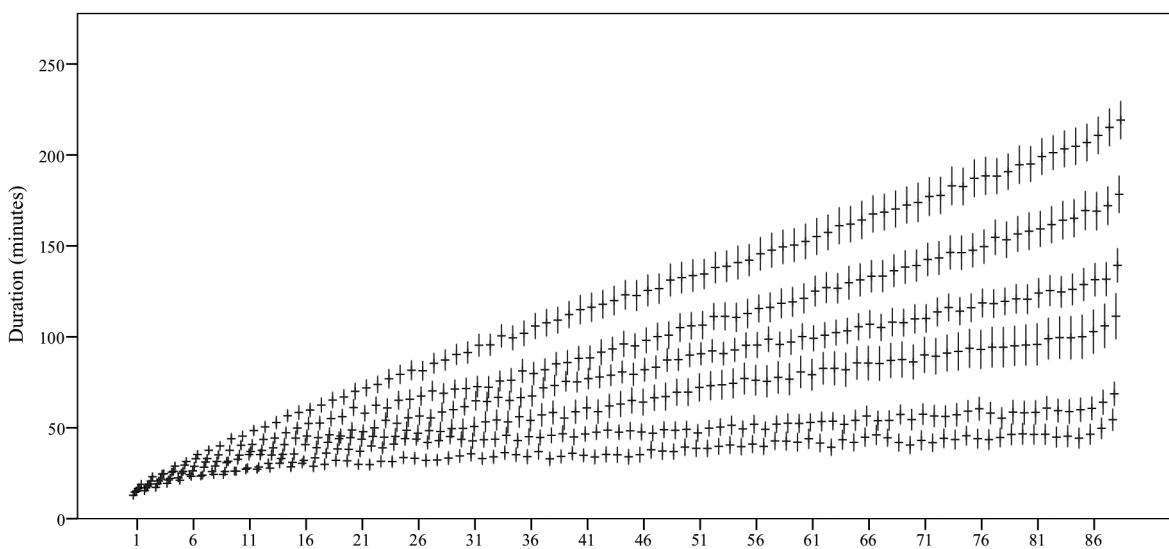

**Supplementary Fig. S2** The total duration of patients visit error bars with 95% confidence intervals.
